# Supplementary material for: Bacterial Community Structure of Pinus Thunbergii Naturally Infected by the Nematode Bursaphelenchus Xylophilus
Source: MDPI journal article supplement (doi:10.3390/microorganisms8020307), 2020-02-23
Supplement: s1 [file s1]

**Table 1.** The bacterial community diversity estimators in needle, root and soil.

|        | Samples  | Sobs     | Chao 1           | Shannon     | Shannoneven |
|--------|----------|----------|------------------|-------------|-------------|
| Needle | diseased | 172 ± 10 | 255.91 ± 9.18    | 3.62 ± 0.11 | 0.70 ± 0.01 |
|        | healthy  | 151 ± 8  | 227.55 ± 27.47   | 3.51 ± 0.19 | 0.70 ± 0.03 |
| Root   | diseased | 685 ± 75 | 1322.18 ± 185.04 | 5.55 ± 0.22 | 0.86 ± 0.02 |
|        | healthy  | 657 ± 47 | 1279.24 ± 133.85 | 5.42 ± 0.08 | 0.84 ± 0.01 |
| Soil   | diseased | 956 ± 60 | 2132.93 ± 90.83  | 6.14 ± 0.14 | 0.89 ± 0.01 |
|        | healthy  | 924 ± 14 | 1978.91 ± 39.38  | 6.11 ± 0.07 | 0.90 ± 0.01 |

The values are shown as means ± standard deviation (n=9, except for soil n=27).

**Table 2.** The relative abundance of phylum between healthy (H) and diseased (D) trees in Root (R), Needle (N) and Soil (S).

| taxon                       | Total       | Needle      |             | Root        |             | Soil        |             |
|-----------------------------|-------------|-------------|-------------|-------------|-------------|-------------|-------------|
|                             |             | DN          | HN          | DR          | HR          | DS          | HS          |
| Proteobacteria              | 41.9 ± 4.5% | 79.1 ± 3.2% | 73.4 ± 4.8% | 44.5 ± 6.5% | 35.4 ± 2.4% | 36.8 ± 1.9% | 37.0 ± 0.4% |
| Actinobacteria              | 29.0 ± 3.7% | 3.1 ± 1.2%  | 3.4 ± 0.9%  | 36.1 ± 5.8% | 36.6 ± 4.4% | 31.5 ± 5.2% | 28.2 ± 3.2% |
| Acidobacteria               | 12.2 ± 1.4% | 1.9 ± 0.5%  | 3.9 ± 1.2%  | 7.0 ± 0.4%  | 11.3 ± 1.5% | 13.8 ± 1.7% | 16.5 ± 2.7% |
| Bacteroidetes               | 4.8 ± 1.0%  | 11.7 ± 1.0% | 10.6 ± 3.3% | 3.5 ± 0.4%  | 2.4 ± 0.3%  | 4.7 ± 1.5%  | 4.3 ± 0.8%  |
| Bacteria_unclassified       | 4.6 ± 0.6%  | 3.0 ± 1.7%  | 6.3 ± 2.2%  | 2.2 ± 0.3%  | 4.7 ± 1.3%  | 5.0 ± 0.4%  | 5.5 ± 0.5%  |
| Planctomycetes              | 2.1 ± 0.3%  | 1.0 ± 0.2%  | 1.3 ± 0.4%  | 1.1 ± 0.2%  | 3.7 ± 0.6%  | 2.0 ± 0.4%  | 2.4 ± 0.4%  |
| Verrucomicrobia             | 1.8 ± 0.2%  |             |             | 1.2 ± 0.4%  | 1.9 ± 0.6%  | 2.2 ± 0.4%  | 2.1 ± 0.3%  |
| Candidatus_Saccharibacteria | 1.4 ± 0.2%  |             |             | 1.4 ± 0.3%  | 0.8 ± 0.1%  | 1.7 ± 0.2%  | 1.7 ± 0.1%  |
| Chloroflexi                 | 1.2 ± 0.2%  |             |             | 0.9 ± 0.2%  | 1.9 ± 0.2%  | 1.4 ± 0.2%  | 1.3 ± 0.3%  |
| Gemmatimonadetes            | 0.6 ± 0.1%  |             |             | 0.3 ± 0.1%  | 0.6 ± 0.2%  | 0.8 ± 0.2%  | 0.7 ± 0.2%  |
| Firmicutes                  | 0.5 ± 0.2%  | 0.2 ± 0.1%  | 1.0 ± 0.1%  | 1.8 ± 0.4%* | 0.6 ± 0.1%  | 0.2 ± 0.1%  | 0.3 ± 0.1%  |

The values are shown as means ± standard deviation (n=9, except for soil n=27). \*  $P < 0.05$ , significant difference in global Kruskal-Wallis test.

**Table 3.** The relative abundance of Order and Genus between healthy (H) and diseased (D) trees in Root (R), Needle (N) and Soil (S).

|       | taxon                  | Total       | Needle       |             | Root        |              | Soil        |             |
|-------|------------------------|-------------|--------------|-------------|-------------|--------------|-------------|-------------|
|       |                        |             | DN           | HN          | DR          | HR           | DS          | HS          |
| Order | <b>Actinomycetales</b> | 16.5 ± 2.4% | 3.0 ± 1.2%   | 3.3 ± 0.9%  | 24.9 ± 5.2% | 23.9 ± 4.2%  | 15.9 ± 1.2% | 14.9 ± 2.3% |
|       | Rhizobiales            | 13.9 ± 3.1% | 26.7 ± 0.1%  | 45.7 ± 1.1% | 6.3 ± 1.1%  | 14.7 ± 0.9%* | 13.7 ± 0.5% | 12.7 ± 1.1% |
|       | Rhodospirillales       | 6.1 ± 0.4%  | 3.0 ± 0.3%   | 4.9 ± 0.8%  | 5.7 ± 0.3%  | 5.6 ± 0.3%   | 6.4 ± 0.3%  | 7.0 ± 1.1%  |
|       | Burkholderiales        | 5.0 ± 1.6%  | 18.7 ± 4.7%a | 2.6 ± 0.6%  | 9.1 ± 2.1%* | 1.2 ± 0.2%   | 3.1 ± 0.2%  | 2.8 ± 0.1%  |
|       | Gaiellales             | 4.0 ± 0.6%  |              |             | 2.6 ± 0.4%  | 2.6 ± 0.5%   | 5.9 ± 0.6%  | 4.4 ± 1.0%  |
|       | Sphingomonadales       | 3.5 ± 1.4%  | 13.8 ± 0.6%  | 12.7 ± 1.0% | 6.3 ± 3.0%* | 0.5 ± 0.1%   | 1.7 ± 0.1%  | 2.0 ± 1.3%  |
|       | Gp6                    | 3.0 ± 0.6%  |              |             | 0.7 ± 0.1%  | 1.1 ± 0.1%   | 4.0 ± 0.3%  | 4.5 ± 1.9%  |
| Genus | Gaiella                | 4.0 ± 0.6%  |              |             | 2.6 ± 0.4%  | 2.6 ± 0.5%   | 5.9 ± 1.5%  | 4.4 ± 1.0%  |
|       | Burkholderia           | 2.3 ± 0.7%  |              |             | 7.8 ± 1.9%* | 0.7 ± 0.2%   | 1.7 ± 0.4%  | 1.6 ± 0.2%  |
|       | Sphingomonas           | 1.7 ± 1.1%  | 11.1 ± 0.9%  | 8.9 ± 0.2%  | 1.6 ± 0.9%* | 0.2 ± 0.1%   | 0.5 ± 0.1%  | 0.7 ± 0.2%  |
|       | Massilia               | 1.4 ± 0.2%  | 16.2 ± 4.9%* | 1.4 ± 0.5%  |             |              |             |             |
|       | Mycobacterium          | 1.2 ± 0.2%  |              |             | 1.7 ± 0.5%  | 1.1 ± 0.1%   | 1.5 ± 0.2%  | 1.2 ± 0.2%  |
|       | Actinospica            | 1.1 ± 0.7%  |              |             | 4.1 ± 2.0%  | 4.2 ± 2.3%   | 0.1 ± 0.1%  | 0.1 ± 0.1%  |
|       | Methylobacterium       | 1.0 ± 0.1%  | 9.9 ± 0.6%   | 13.1 ± 3.2% |             |              |             |             |

The values are shown as means ± standard deviation (n=9, except for soil n=27). \*  $P < 0.05$ , significant difference in global Kruskal-Wallis test.
